# Supplementary material
Source: Research Square preprint supplement (doi:10.21203/rs.3.rs-7808983/v2)
Supplement: Supplementary file 1 [file d10843b456a20eb180157be7.docx]

Adopting and implementing local government policy restrictions on harmful commodities advertising in England: A qualitative exploration of challenges, facilitators and impacts

Additional files

Contents

[Additional file 1: Interview topic guide 2](#_Toc205994488)

[Additional file 2: Deductive codes used in the qualitative analysis 7](#_Toc205994489)

[Additional file 3: Quality assurance measures employed to ensure data trustworthiness 9](#_Toc205994490)

[References 10](#_Toc205994491)

# Additional file 1: Interview topic guide

**Equipment**

- Password-protected audio recorder or video-conferencing software
- Telephone device, if applicable (e.g., Olympus TP8)
- Spare batteries
- Pens and paper
- Consent form

**Introduction**

- Hello, this is [name] from the University of Bristol, how are you? Have you had a chance to look at the Information Sheet and Consent Form I sent with my email the other day?
- *If yes to the above*: Great – is it still convenient for you to do the interview now? It will take **up to an hour**.
- *If yes*: Great - Thank you so much for sparing your time.
- So before starting the interview, I’m just going to talk a bit about the study, which is part of a wider project funded by the National Institute for Health and Care Research’s School for Public Health Research. I’m then going to record your consent to take part.
- So firstly, just to give a bit of **information about the study**, we want to understand and compare how, through policy, local authorities in England are restricting the advertising and sponsorship of products and services that are harmful to people’s health and to the environment, such as alcohol, tobacco, vaping junk food, gambling and fossil fuels. We know that over 100 councils are planning, or have already introduced these policies, but that these vary in terms of how they define advertising, the commodities they include, the types of advertising and sponsorship affected, and other factors. These factors may affect the impacts of these restrictions, but this has not yet been evaluated. To inform a future evaluation of this, we are interested in interviewing stakeholders, such as yourself, who were involved in the development and/or implementation of their local authority’s advertising and sponsorship policy, to further explore the characteristics of these policies and their design, implementation and anticipated impacts.
- This interview will just be a **discussion** about [local authority]’s advertising and sponsorship policy, rather than a questionnaire with clear yes/no answers. There are no wrong or right answers, and you **don’t have to answer all of the questions** if you don’t want to. Feel free to **ask questions or ask to stop the interview** at any time.
- Anything that you tell me is **confidential** and won’t be linked to you – when the interview is typed up, any specific names or places you mention will be removed, so that only **anonymised quotes** will be used in the reports, publications or teaching materials that come from this study. Your employer and colleagues will not have access to participation records or any identifiable data from the study. The only reason I would need to break confidentiality would be if you say something that makes me concerned about harm to you or someone else.
- When I start the voice recorder, I’m going to read out each statement on the version of the study’s **consent form** you received by email/in the post. If you could please confirm that you’re **happy with each statement** I will sign them for you on your behalf. Sorry that this might seem a bit formal and lengthy, but this is just something we have to do as part of the University ethics regulations.
- Do you have **any questions** before I start the recording? If it’s OK, I will start recording now.

START CONSENT RECORDING

- *State interviewer name, participant name, participant ID number and date/time of interview*
- *Read out each statement on the consent form. Ask participant to say ‘Yes’ after each statement if they are happy with the statement.*
- *Explain to the participant that you are now going to stop the audio recording, and re-start recording for the main part of the interview. Explain that this is so that their surname can be omitted from the interview*

STOP CONSENT RECORDING & START NEW, INTERVIEW RECORDING

- *State interviewer name, participant ID and date/time of interview (do NOT state participant’s full name)*

1. **Participant background/role**

Introduction: Just to provide some background information, please could you tell me a bit about your role at [local authority]?

- - Were you in this role at the time [local authority]’s current advertising and sponsorship policy was developed?
  - *If no*: What was your role at the time? Were you in that role at the time the policy was implemented (*if applicable*)?
- Could you say a bit about whether and how you were involved in developing [local authority]’s current advertising and sponsorship policy?
- And were you involved in implementing the policy (*if applicable*)?
  - In what ways?
- Could you tell me a bit about your own views and experiences of the advertising and sponsorship of harmful commodities in your local area?

1. **Policy background/development**

Introduction: Now I’ll be asking you about when and how [local authority]’s advertising and sponsorship policy was developed

- Could you tell me when [local authority] began developing this policy?
  - What was the ‘trigger’ for this? Why did they decide to develop this policy?
    - For example, was it developed in response to any local issues?
- What methods or processes were used to develop and inform this policy?
  - Who was involved in this development work?
  - Did members of the public have an opportunity to inform or be involved in this process? And did they?
  - Were commercial stakeholders, such as shopkeepers or tobacco, drinks or gambling industry representatives, involved in this process? How?
    - *If yes*: Did this shape the final policy? How so?
- How did [local authority] decide which commodities this policy would (not) target?
- How did [local authority] decide which mode(s) of advertising and sponsorship this policy would and would not target?
  - For instance, why was it decided that the advertising and sponsorship restrictions would apply to council-owned [websites] and tendered advertising space on [buses, bus shelters] but not [e.g., leased premises, billboards]?

1. **Policy implementation/enforcement/impacts**

Introduction: Now I’ll be asking you about when and how [local authority]’s advertising and sponsorship policy was implemented (or how it will be implemented, if it hasn’t already been)

- When did/will the policy come into effect?
- What steps were/will be taken to implement the policy?
- How was its introduction communicated to relevant stakeholders?
  - For instance, did you share the policy document through any communication channels? *[council’s website, emailed to the council’s advertising sales contractors]*
- How is/will the policy be enforced?
  - What would happen to advertisements that are accepted and later found not to comply with the policy?
  - Are there fines or sanctions associated with non-compliance?
- *If applicable*: Has the policy been easy to implement? Why (not)?
  - What have been the barriers and facilitators of its implementation? *[E.g., council’s reliance on revenue from advertising]*
- *If applicable*: Has the policy been well-received?
  - Has it received any backlash? Who from?
- What impacts does/did [local authority] expect this policy to have?
  - Are/were these impacts specific to any particular population groups? Why?
  - *If applicable*: Do you feel the policy has actually had these impacts/effects?
  - *If applicable*: Has it had any unexpected impacts?
    - Have commercial stakeholders made any adaptations to circumvent the policy? *[E.g., advertising healthier alternatives, using advertising space not owned or leased by the council]*
  - Does [local authority] plan to evaluate the policy at any point?
    - What will this involve?
    - If the policy were to be evaluated, what outcomes would you like to see included in this?
- Has the policy been adapted in any way? Why?

1. **Policy context**

Introduction: Now I’ll be asking you about wider contextual factors that may influence [local authority]’s advertising and sponsorship policy and its impacts

- Does [local authority] have any other policies or interventions that might affect its advertising [and sponsorship] policy and its impacts?
- Are there any other contextual factors at play which might affect this policy’s impact?
  - For instance, are less harmful products and services available in [local authority area], as alternatives to the commodities whose advertisement and sponsorship are restricted? *[For example: healthier food alternatives to junk food]*
  - How does [local authority]’s advertising space compare to non-council-owned advertising space in [area], in terms of reach and positioning?
  - Are there any other such factors you think might affect the impacts of [local authority]’s advertising and sponsorship restrictions?

**End**

- We’re just coming to the end of the interview now [name] - Is there anything we haven’t covered that you’d like to add?
- That’s all the questions I have for you today. Do you have any questions for me?
- I will stop recording the interview now.

STOP RECORDING

- Thank you so much for your time - I really appreciate you sharing your views with me

*Reassure them about confidentiality and anonymity*

- Lastly, would you like to be informed of the outcomes and findings of this research?

*If yes*: Is it ok to use the email address you previously provided, for this?

- It was lovely speaking to you, thank you again, enjoy the rest of your day

# Additional file 2: Deductive codes used in the qualitative analysis

i. Policy development/adoption

- 1. participant’s job role
  2. participant's role in policy development
  3. when policy initiated
  4. when politiy adopted
  5. trigger/facilitator
  6. barrier
  7. development process (stages)
  8. development process (duration)
  9. local authority stakeholder involvement
  10. public involvement
  11. commercial stakeholder involvement
  12. commodity selection
  13. exemptions

1. Policy implementation/enforcement
   1. when implemented
   2. implementation process/communication
   3. enforcement process
   4. enforcing body
   5. restriction limitations
   6. non-compliance implications
   7. facilitator
   8. barrier
   9. policy reception
   10. (anticipated) impact
   11. contextual factor
2. Policy evaluation
   1. evaluation plans
   2. evaluation facilitator
   3. evaluation barrier

# Additional file 3: Quality assurance measures employed to ensure data trustworthiness

| **Data trustworthiness criteria (Lincoln & Guba, 1986)** | **Quality assurance measures (to meet these criteria)** |
| --- | --- |
| Credibility *(participants’ views are well-represented by the research (Nowell et al., 2017))* | - Multiple participants were interviewed, prior research informed the deductive codes, and the themes represented the views of multiple participants. - Co-investigators provided feedback on the first author’s interpretations of the raw data and developing themes. - Reflexivity review to identify how our positionality shaped the research and account for this (Braun & Clarke, 2021; Cutcliffe, 2003). |
| Dependability *(the findings are consistent and reproducible (Nowell et al., 2017))* | - Use of the framework analysis method, where the use of ‘audit trails’ to map analytic progress provides analytic transparency (Gale et al., 2013; Ritchie & Spencer, 1994). - Reflexivity review and memos recording analytic decisions and rationale, to increase the transparency of the analytic process (Pillow, 2003). |
| Transferability *(the findings can be generalised or extrapolated to other contexts (Nowell et al., 2017))* | - Maximum variation purposive sampling approach involving sampling criteria representing ‘salient characteristics’ (Ritchie et al., 2013; Spencer et al., 2004). - Detailed account of the study, its context, and the participant sample, to allow readers to make conclusions about transferability. - Discussion of the study sample’s limitations. |
| Confirmability *(the findings are clearly derived from the data (Nowell et al., 2017))* | - Review of the interview transcripts to ensure candidate themes encapsulate participants’ verbatim views. - Use of participant quotes to support the reported themes. |

# References

Braun, V., & Clarke, V. (2021). *Thematic Analysis: A Practical Guide.* (First ed.). SAGE Publications.

Cutcliffe, J. R. (2003). Reconsidering reflexivity: Introducing the case for intellectual entrepreneurship. *Qualitative health research*, *13*(1), 136-148. https://doi.org/10.1177/1049732302239416

Gale, N. K., Heath, G., Cameron, E., Rashid, S., & Redwood, S. (2013). Using the framework method for the analysis of qualitative data in multi-disciplinary health research. *BMC medical research methodology*, *13*(1), 1-8. https://doi.org/10.1186/1471-2288-13-117

Lincoln, Y. S., & Guba, E. G. (1986). But is it rigorous? Trustworthiness and authenticity in naturalistic evaluation. *New directions for program evaluation*, *1986*(30), 73-84. https://doi.org/10.1002/ev.1427

Nowell, L. S., Norris, J. M., White, D. E., & Moules, N. J. (2017). Thematic analysis: Striving to meet the trustworthiness criteria. *International journal of qualitative methods*, *16*(1), 1-13. https://doi.org/10.1177/1609406917733847

Pillow, W. (2003). Confession, catharsis, or cure? Rethinking the uses of reflexivity as methodological power in qualitative research. *International journal of qualitative studies in education*, *16*(2), 175-196. https://doi.org/10.1080/0951839032000060635

Ritchie, J., Lewis, J., Nicholls, C. M., & Ormston, R. (2013). *Qualitative research practice: A guide for social science students and researchers* (Second ed.). SAGE Publications.

Ritchie, J., & Spencer, L. (1994). Qualitative data analysis for applied policy research. In A. Bryman & R. Burgess (Eds.), *Analyzing qualitative data* (pp. 187-208). Routledge.

Spencer, L., Ritchie, J., Lewis, J., & Dillon, L. (2004). *Quality in qualitative evaluation: a framework for assessing research evidence*.
